# Supplementary material for: Occurrence of Highly Conjugative IncX3 Epidemic Plasmid Carrying blaNDM in Enterobacteriaceae Isolates in Geographically Widespread Areas
Source: PubMed Central journal article supplement (PMC6158458; doi:10.3389/fmicb.2018.02272), 2018-09-20
Supplement: Data_Sheet_1.pdf [file Data_Sheet_1.pdf]

Supplementary file

**Table S1.** Culture medium and antibiotics used for selection of transconjugants

| Recipient strain and feature                                            | Agar medium | Agent or antibiotic added to agar medium in conjugation experiment <sup>a</sup> |                                 |
|-------------------------------------------------------------------------|-------------|---------------------------------------------------------------------------------|---------------------------------|
|                                                                         |             | NDM-carrying IncX3 plasmids                                                     | CTX-M-14-carrying pHK01 plasmid |
| <i>Escherichia coli</i> J53<br>(azide-R, laboratory strain)             | MacConkey   | Azide and meropenem                                                             | Azide and cefotaxime            |
| <i>E. coli</i> ST405<br>(Azi-R, clinical isolate)                       | MacConkey   | Azide and meropenem                                                             | Azide and cefotaxime            |
| <i>E. coli</i> ST131<br>(Azi-R, clinical isolate)                       | MacConkey   | Azide and meropenem                                                             | Azide and cefotaxime            |
| <i>Shigella flexneri</i><br>(clinical isolate)                          | XLD         | Meropenem                                                                       | Cefotaxime                      |
| <i>Salmonella enteritidis</i><br>(clinical isolate)                     | XLD         | Meropenem                                                                       | Cefotaxime                      |
| <i>Klebsiella pneumoniae</i><br>(clinical isolate)                      | UriSelect4  | Meropenem                                                                       | Cefotaxime                      |
| <i>Pseudomonas aeruginosa</i><br>(Azi-R, PT224, ATCC 27853, NCTC 10662) | MacConkey   | Azide and meropenem                                                             | Azide and cefotaxime            |
| <i>Acinetobacter baumannii</i><br>(Azi-R, ATCC 17959, ATCC 19606)       | MacConkey   | Azide and meropenem                                                             | Azide and cefotaxime            |

Abbreviations: Azi-R, resistant to sodium azide; XLD, xylose Lysine Deoxycholate.

<sup>a</sup> At the following concentration: sodium azide (100 µg ml<sup>-1</sup>), meropenem (0.25 µg ml<sup>-1</sup>) and/or cefotaxime (1 µg ml<sup>-1</sup>).

**Table S2.** Summary of 49 IncX3 plasmids.

| No. | Plasmid Name <sup>a</sup> | NDM allele | Geographical Origin <sup>b</sup> | Species <sup>c</sup> | Accession | Plasmid size, bp (query coverage/identity) <sup>d</sup> | Host source | Year collected | Genetic load region, bp <sup>e</sup> |
|-----|---------------------------|------------|----------------------------------|----------------------|-----------|---------------------------------------------------------|-------------|----------------|--------------------------------------|
| 1   | pIncX-SHV                 | None       | Italy                            | KP                   | JN247852  | 43,380 (94.0%/99.9%)                                    | Human       | 2010           | 13,287                               |
| 2   | pNDM-HN380                | NDM-1      | China (HU)                       | KP                   | JX104760  | 54,035 (100.0%/99.9%)                                   | Human       | 2011           | 23,944                               |
| 3   | pCRE3694-NDM1*            | NDM-1      | Hong Kong                        | EC                   | MH234505  | 53,097 (98.7%/99.9%)                                    | Human       | 2016           | 23,006                               |
| 4   | pCREC-544 2               | NDM-1      | Korea (IC)                       | EC                   | CP024828  | 51,455 (100.0%/99.9)                                    | Human       | 2015           | 21,365                               |
| 5   | pCRENT-193 2              | NDM-1      | Korea (SL)                       | ENTSP                | CP024814  | 44,962 (97.4%/99.9%)                                    | Human       | 2013           | 14,871                               |
| 6   | pJEG027                   | NDM-4      | Myanmar                          | KP                   | KM400601  | 46,253 (100.0%/99.8%)                                   | Human       | na             | 16,070                               |
| 7   | pM213 X3                  | NDM-4      | Myanmar                          | EC                   | AP018142  | 43,534 (94.0%/99.9%)                                    | Human       | 2015           | 13,443                               |
| 8   | pM216 X3                  | NDM-4      | Myanmar                          | EC                   | AP018146  | 46,161 (100.0%/99.9%)                                   | Human       | 2015           | 16,070                               |
| 9   | pCREC-532 3               | NDM-1      | Korea (BS)                       | EC                   | CP024833  | 46,137 (99.9%/99.9%)                                    | Human       | 2015           | 16,070                               |
| 10  | pM110 X3                  | NDM-7      | Myanmar                          | EC                   | AP018141  | 45,122 (97.7%/99.9%)                                    | Human       | 2015           | 15,031                               |
| 11  | pEC50-NDM7                | NDM-7      | China                            | EC                   | KX470735  | 46,161 (100.0%/99.9%)                                   | Human       | na             | 16,070                               |
| 12  | pCREC-629 3               | NDM-7      | Korea (JN)                       | EC                   | CP024818  | 46,161 (100.0%/99.9%)                                   | Human       | 2015           | 16,070                               |
| 13  | pKpN01-NDM7               | NDM-7      | Canada                           | KP                   | CP012990  | 46,161 (100.0%/99.9%)                                   | Human       | 2013           | 16,070                               |
| 14  | pOM26-1                   | NDM-7      | Oman                             | EC                   | KP776609  | 45,122 (97.7%/99.9%)                                    | Human       | na             | 15,031                               |
| 15  | pKW53TNDM                 | NDM-7      | Kuwait                           | EC                   | KX214669  | 46,161 (100.0%/99.9%)                                   | Human       | 2012           | 16,070                               |
| 16  | pSCE516-2                 | NDM-1      | China                            | EC                   | KX023261  | 46,254 (100.0%/99.9%)                                   | Chicken     | 2015           | 16,071                               |
| 17  | pCRE3855-NDM5*            | NDM-5      | Hong Kong                        | EC                   | MH234498  | 46,161 (100.0%/100.0%)                                  | Human       | 2016           | 16,070                               |
| 18  | pCRE3712-NDM5*            | NDM-5      | Hong Kong                        | EC                   | MH234503  | 46,161 (100.0%/100.0%)                                  | Human       | 2016           | 16,070                               |
| 19  | pP785-NDM5                | NDM-5      | China (GD)                       | EC                   | MF547509  | 46,161 (100.0%/99.9%)                                   | Pig         | 2016           | 16,070                               |
| 20  | pP788A-NDM5               | NDM-5      | China (GD)                       | EC                   | MF547510  | 46,161 (100.0%/100.0%)                                  | Pig         | 2016           | 16,070                               |
| 21  | pP768-NDM5                | NDM-5      | China (HU)                       | EC                   | MF547508  | 46,161 (100.0%/100.0%)                                  | Pig         | 2016           | 16,070                               |
| 22  | pCRE3836-NDM5*            | NDM-5      | Hong Kong                        | EC                   | MH234499  | 46,161 (100.0%/99.9%)                                   | Human       | 2016           | 16,070                               |
| 23  | pCRE3774-NDM5*            | NDM-5      | Hong Kong                        | EC                   | MH234502  | 45,547 (98.7%/100.0%)                                   | Human       | 2016           | 15,456                               |
| 24  | pCRE3871-NDM5*            | NDM-5      | Hong Kong                        | EC                   | MH234497  | 46,161 (100.0%/100.0%)                                  | Human       | 2016           | 16,070                               |
| 25  | pCRE3819-NDM5*            | NDM-5      | Hong Kong                        | KP                   | MH234500  | 46,161 (100.0%/100.0%)                                  | Human       | 2016           | 16,070                               |
| 26  | pCRE3218-NDM5*            | NDM-5      | Hong Kong                        | EC                   | MH234507  | 46,161 (100.0%/100.0%)                                  | Human       | 2016           | 16,070                               |
| 27  | pCRE2967-NDM5*            | NDM-5      | Hong Kong                        | EC                   | MH234509  | 47,474 (100.0%/99.9%)                                   | Human       | 2016           | 17,383                               |
| 28  | pCRE2998-NDM5*            | NDM-5      | Hong Kong                        | KP                   | MH234508  | 46,161 (100.0%/100.0%)                                  | Human       | 2016           | 16,070                               |
| 29  | pCREC-A6-NDM              | NDM-1      | China                            | EC                   | KX960109  | 46,037 (100.0%/99.7%)                                   | Human       | na             | 16,002                               |
| 30  | pZHDC40                   | NDM-5      | China                            | EC                   | KY041843  | 45,346 (98.2%/100.0%)                                   | Human       | 2015           | 15,255                               |

|    |                 |        |            |      |          |                        |         |         |        |
|----|-----------------|--------|------------|------|----------|------------------------|---------|---------|--------|
| 31 | pECNDM101       | NDM-5  | China      | EC   | KX507346 | 46,165 (100.0%/99.9%)  | Pig     | na      | 16,073 |
| 32 | pCREC-591 4     | NDM-5  | Korea (IC) | EC   | CP024825 | 46,161 (100.0%/99.9%)  | Human   | 2015    | 16,070 |
| 33 | pEc1929         | NDM-5  | China      | EC   | KT824791 | 46,164 (100.0%/99.9%)  | Human   | 2014    | 16,071 |
| 34 | pP855-NDM5      | NDM-5  | China (GD) | EC   | MF547511 | 46,161 (100.0%/99.9%)  | Pig     | 2017    | 16,070 |
| 35 | pP744T-NDM5     | NDM-5  | China (HN) | EC   | MF547507 | 45,547 (98.7%/100.0%)  | Pig     | 2015    | 15,456 |
| 36 | pNDM5 WCHEC0215 | NDM-5  | China      | EC   | KY435936 | 47,337 (100.0%/97.4%)  | Human   | na      | 17,268 |
| 37 | pK518 NDM5      | NDM-5  | China (ZJ) | KM   | CP023188 | 46,146 (100.0%/99.9%)  | Human   | 2017    | 16,070 |
| 38 | pK516 NDM5      | NDM-5  | China (ZJ) | KM   | CP022351 | 46,149 (100.0%/99.9%)  | Human   | 2017    | 16,070 |
| 39 | pNDM-QD28       | NDM-5  | China (QD) | EC   | KU167608 | 46,161 (100.0%/99.9%)  | Human   | 2013    | 16,070 |
| 40 | pNDM-QD29       | NDM-5  | China (QD) | EC   | KU167609 | 46,161 (100.0%/99.9%)  | Human   | 2013    | 16,070 |
| 41 | pNDM5 IncX3     | NDM-5  | China      | KP   | KU761328 | 46,161 (100.0%/99.9%)  | Human   | 2015    | 16,070 |
| 42 | p1493-2         | NDM-5  | China (SZ) | EC   | CP019073 | 46,145 (100.0%/99.9%)  | Human   | 2013    | 16,068 |
| 43 | pCRE3706-NDM5*  | NDM-5  | Hong Kong  | KP   | MH234504 | 46,161 (100.0%/99.9%)  | Human   | 2016    | 16,070 |
| 44 | pCRE3816-NDM5*  | NDM-5  | Hong Kong  | KP   | MH234501 | 46,161 (100.0%/99.9%)  | Human   | 2016    | 16,070 |
| 45 | NUHL24835       | NDM-5  | China (JX) | KP   | CP014006 | 46,161 (100.0%/99.9%)  | Human   | 2014    | 16,070 |
| 46 | pCRCB-101 1     | NDM-7  | Korea (IC) | CF   | CP024820 | 46,161 (100.0%/99.9%)  | Human   | 2015    | 16,070 |
| 47 | pAD-19R         | NDM-17 | China (SD) | EC   | KX833071 | 46,161 (100.0%/99.9%)  | Chicken | 2015    | 16,070 |
| 48 | pCRE3473-NDM5*  | NDM-5  | Hong Kong  | ECL0 | MH234506 | 46,161 (100.0%/100.0%) | Human   | 2016    | 16,070 |
| 49 | pNDM-MGR194     | NDM-5  | India      | KP   | KF220657 | 46,253 (100.0%/99.9%)  | Human   | 2011-13 | 16,070 |

<sup>a</sup> Plasmids sequenced in the present study are marked with an asterisk

<sup>b</sup> BS, Busan; IC, Incheon ; SL, Seoul; GD, Guangdong; BJ, Beijing; HN, Henan; HU, Hunan; JN, Jeonnam; JS, Jiangsu; JX, Jiangxi; QD, Qingdao; SD, Shandong; ZJ, Zhejiang.

<sup>c</sup> CF, *Citrobacter freundii*; EC, *Escherichia coli*; ECL0, *Enterobacter cloacae*; ENTSP, *Enterobacter species*; KP, *Klebsiella pneumoniae*; KM, *Klebsiella michiganensis*

<sup>d</sup> Percentages coverage and identity by using pNDM-HK2998 as a reference

<sup>e</sup> The genetic load region is between the resolvase gene and the *hns* gene. In all the plasmids, ISL3 was inserted at the same positions in the same orientations.

**Figure S1.** Sequence alignment of new *fumC*, *icd*, *mdh* and *recA* alleles in two *E. coli* strains (CRE 3725 and CRE 3775) from this study with other closely related alleles.

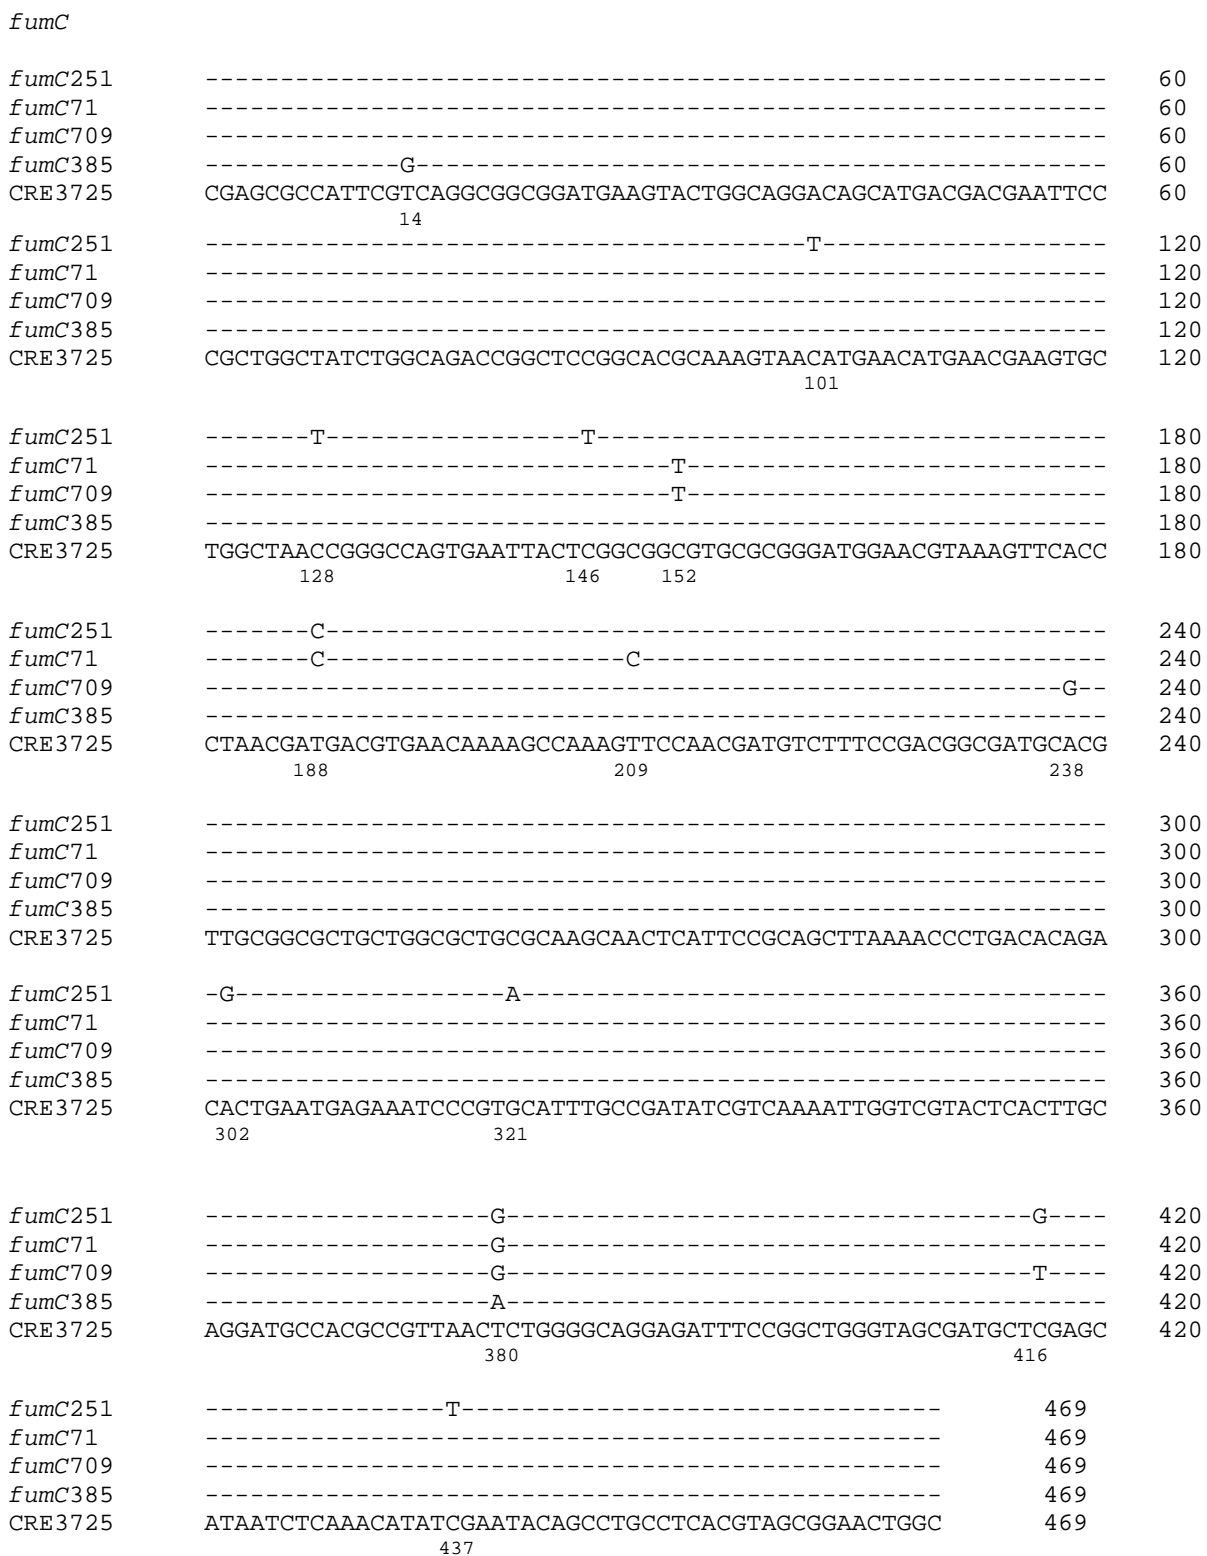

*icd*

|               |                                                               |     |
|---------------|---------------------------------------------------------------|-----|
| <i>icd161</i> | -----                                                         | 60  |
| <i>icd479</i> | -----                                                         | 60  |
| <i>icd242</i> | -----                                                         | 60  |
| <i>icd168</i> | -----                                                         | 60  |
| CRE3725       | CGACGCTGCAGTCGAGAAAGCCTATAAAGGCGAGCGTAAAAATCTCCTGGATGGAAATTTA | 60  |
|               |                                                               |     |
| <i>icd161</i> | -----                                                         | 120 |
| <i>icd479</i> | -----                                                         | 120 |
| <i>icd242</i> | -----                                                         | 120 |
| <i>icd168</i> | -----                                                         | 120 |
| CRE3725       | CACCGGTGAAAAATCCACACAGGTTTATGGTCAGGATGTCTGGCTGCCTGCTGAAACCCT  | 120 |
|               |                                                               |     |
| <i>icd161</i> | -----                                                         | 180 |
| <i>icd479</i> | -----                                                         | 180 |
| <i>icd242</i> | -----                                                         | 180 |
| <i>icd168</i> | -----                                                         | 180 |
| CRE3725       | TGATCTGATTTCGTGAATATCGCGTTGCTATTAAGGCCCGCTGACCACTCCGGTTGGTGG  | 180 |
|               |                                                               |     |
| <i>icd161</i> | -----G-----                                                   | 240 |
| <i>icd479</i> | -----C-----                                                   | 240 |
| <i>icd242</i> | -----G-----                                                   | 240 |
| <i>icd168</i> | -----                                                         | 240 |
| CRE3725       | CGGTATTCGTTCTCTTAACGTTGCCCTGCGCCAGGAAGTGGATCTCTACATCTGCCTGCG  | 240 |
|               | 196                                                           |     |
|               |                                                               |     |
| <i>icd161</i> | -----                                                         | 300 |
| <i>icd479</i> | -----                                                         | 300 |
| <i>icd242</i> | -----                                                         | 300 |
| <i>icd168</i> | -----                                                         | 300 |
| CRE3725       | TCCGGTACGTTACTATCAGGGCACCCCAAGCCCGTTAAACACCCTGAACTGACCGATAT   | 300 |
|               |                                                               |     |
| <i>icd161</i> | -----                                                         | 360 |
| <i>icd479</i> | -----                                                         | 360 |
| <i>icd242</i> | -----G-----                                                   | 360 |
| <i>icd168</i> | -----                                                         | 360 |
| CRE3725       | GGTTATCTTCCGTGAAAACCTCGGAAGACATTTATGCAGGTATCGAATGGAAAGCTGACTC | 360 |
|               | 336                                                           |     |
|               |                                                               |     |
| <i>icd161</i> | -----                                                         | 420 |
| <i>icd479</i> | -----                                                         | 420 |
| <i>icd242</i> | -----C-----                                                   | 420 |
| <i>icd168</i> | -----                                                         | 420 |
| CRE3725       | TGCCGACGCTGAGAAAGTGATTAATTCCTGCGTGAAGAGATGGGCGTGAAGAAAATTCG   | 420 |
|               | 370                                                           |     |
|               |                                                               |     |
| <i>icd161</i> | -----C-----C-----                                             | 480 |
| <i>icd479</i> | -----C-----A-----T-----                                       | 480 |
| <i>icd242</i> | -----G-----                                                   | 480 |
| <i>icd168</i> | -----G-----                                                   | 480 |
| CRE3725       | CTTCCCGGAACATTGTGGTATCGGTATTAAGCCGTGTTCTGAAGAAGGCACCAAACGTCT  | 480 |
|               | 430 436 448 460 472                                           |     |
|               |                                                               |     |
| <i>icd161</i> | ---C---C-----                                                 | 518 |
| <i>icd479</i> | -----                                                         | 518 |
| <i>icd242</i> | -----                                                         | 518 |
| <i>icd168</i> | -----                                                         | 518 |
| CRE3725       | GGTTCGTGCAGCGATCGAATACGCAATTGCTAACGATC                        | 518 |
|               | 484 490                                                       |     |

*mdh*

|               |                                                                        |     |
|---------------|------------------------------------------------------------------------|-----|
| <i>mdh590</i> | -----                                                                  | 60  |
| <i>mdh441</i> | --T-----                                                               | 60  |
| <i>mdh249</i> | -----                                                                  | 60  |
| <i>mdh6</i>   | -----G-----                                                            | 60  |
| CRE3725       | GGCGTAGCGCGTAAACCAGGTATGGATCGTTCCGACCTGTTTAACGTTAACGCCGGCATC<br>3 18   | 60  |
| <i>mdh590</i> | -----T                                                                 | 120 |
| <i>mdh441</i> | -----                                                                  | 120 |
| <i>mdh249</i> | -----                                                                  | 120 |
| <i>mdh6</i>   | -----                                                                  | 120 |
| CRE3725       | GTGAAAAACCTGGTACAGCAAGTTGCGAAAACCTGCCCGAAAGCGTGCATTGGTATTATC<br>120    | 120 |
| <i>mdh590</i> | -----G-----                                                            | 180 |
| <i>mdh441</i> | -----                                                                  | 180 |
| <i>mdh249</i> | -----T-----                                                            | 180 |
| <i>mdh6</i>   | -----                                                                  | 180 |
| CRE3725       | ACTAACCCGGTTAACACCACAGTTGCAATTGCTGCTGAAAGTCTGAAAAAGCCGGTGTT<br>141 147 | 180 |
| <i>mdh590</i> | -----                                                                  | 240 |
| <i>mdh441</i> | -----                                                                  | 240 |
| <i>mdh249</i> | -----                                                                  | 240 |
| <i>mdh6</i>   | -----                                                                  | 240 |
| CRE3725       | TATGACAAAAACAACCTGTTTCGGCGTTACCACGCTGGATATCATTTCGTTCCAACACCTTT         | 240 |
| <i>mdh590</i> | -----                                                                  | 300 |
| <i>mdh441</i> | -----                                                                  | 300 |
| <i>mdh249</i> | -----                                                                  | 300 |
| <i>mdh6</i>   | -----                                                                  | 300 |
| CRE3725       | GTTGCGGAAGTCAAAGGCAACAGCCAGGCGAAGTTGAAAGTCCCGGTTATTGGCGGTCAC           | 300 |
| <i>mdh590</i> | -----                                                                  | 360 |
| <i>mdh441</i> | -----                                                                  | 360 |
| <i>mdh249</i> | -----                                                                  | 360 |
| <i>mdh6</i>   | -----                                                                  | 360 |
| CRE3725       | TCTGGTGTACCATTCTGCCGCTGCTGTACAGGTTCTGGCGTTAGTTTTACCGAGCAG              | 360 |
| <i>mdh590</i> | -----                                                                  | 420 |
| <i>mdh441</i> | -----                                                                  | 420 |
| <i>mdh249</i> | -----                                                                  | 420 |
| <i>mdh6</i>   | -----                                                                  | 420 |
| CRE3725       | GAAGTGGCTGATCTGACCAAACGTATCCAGAACGCGGTTACTGAGGTGGTTGAAGCGAAA           | 420 |
| <i>mdh590</i> | ----- 452                                                              |     |
| <i>mdh441</i> | ----- 452                                                              |     |
| <i>mdh249</i> | ----- 452                                                              |     |
| <i>mdh6</i>   | ----- 452                                                              |     |
| CRE3725       | GCCGGTGGCGGGTCTGCAACCCTGTCTATGGG 452                                   |     |
